# Supplementary material for: Examining the implementation level of art therapy as an intervention for students with psychological problems in colleges and universities in China
Source: Research Square preprint supplement (doi:10.21203/rs.3.rs-7401681/v1), 2025-12-01
Supplement: Supplementary file 1 [file aaaf41c15a7601f8ae08f76c.docx]

**Table 1.** Distribution of teachers/counselors in different universities.

| **College** | **Total Number of Teachers/Counsellors** | **Sample size** | **%** |
| --- | --- | --- | --- |
| SCBC | 6 | 5 | 7 |
| GMU | 16 | 13 | 18 |
| BNU | 47 | 39 | 54 |
| CCOM | 9 | 7 | 10 |
| CHCM | 9 | 9 | 10 |
| Total | 87 | 72 | 100 |
