# Supplementary material for: Examining the implementation level of art therapy as an intervention for students with psychological problems in colleges and universities in China
Source: Research Square preprint supplement (doi:10.21203/rs.3.rs-7401681/v1), 2025-12-01
Supplement: Supplementary file 2 [file e2dd653b02886d4841069214.docx]

**Table 2.** *Implementation Level of Art Therapy in Psychology among Colleges and Universities.*

| **Indicators** | **Mean** | **SD** | **VI** | **Rank** |
| --- | --- | --- | --- | --- |
| 1. We have a good number of trained art therapists on campus who organize art therapy workshops focusing on stress relief techniques. Students are made to engage in activities like painting, drawing, or sculpting to express their emotions and alleviate stress. These workshops are held regularly | 3.44 | 1.28 | Average Level of Implementation | 6 |
| 2. Mindfulness practices are integrated into art therapy sessions to help students develop awareness of the present moment and manage stress. They do mindful drawing or painting to enhance their focus, reduce anxiety, and promote relaxation. | 3.31 | 1.11 | Average Level of Implementation | 8 |
| 3. Our school collaborates with local communities or organizations to develop art therapy projects that address social issues or promote mental health awareness. For example, we create artwork to raise awareness about mental health stigma or to support marginalized groups within the community | 3.44 | 1.09 | Average Level of Implementation | 6 |
| 4. Our college designates spaces specifically for art therapy sessions, which are conducive to creativity and relaxation, with adequate supplies and materials for students to use during sessions. | 3.60 | 1.17 | High Level of Implementation | 3 |
| 5. There is a privacy being maintained during therapy sessions. We offer individual art therapy sessions where students can explore their thoughts, feelings, and personal goals through creative expression. | 3.71 | 1.16 | High Level of Implementation | 1.5 |
| 6. There is a campaign against stigma related to having therapy sessions due to mental health concerns. And this encourages many of our students to come to us for help | 1.88 | 0.89 | Low Level of Implementation | 10 |
| 7. Our students are informed about art therapy sessions. We have art therapy groups where students come together to share their experiences and support one another through artistic expression. This is beneficial for students dealing with similar issues such as anxiety, depression | 3.57 | 1.05 | High Level of Implementation | 4 |
| 8. The guidance office provide information on the benefits of art therapy program in campus. This could include advertising through campus newsletters, social media, or posters, to raise awareness about the benefits of art therapy. | 3.44 | 1.06 | Average Level of Implementation | 6 |
| 9. The guidance office provides alternative schedule of art therapy sessions due to other school activities. Examples include online platforms that provide access to art therapy activities and techniques for students who prefer remote or self-guided interventions. | 3.28 | 1.05 | Average Level of Implementation | 9 |
| 10. There are resources / materials for art therapy sessions, including instructional videos, creative prompts that are used for different students based on their needs. | 3.71 | 0.96 | High Level of Implementation | 1.5 |
| **Overall Result** | **3.33** | **0.77** | **Average Level of Implementation** |  |
